# Supplementary material for: Cell Retention as a Viable Strategy for PHA Production from Diluted VFAs with Bacillus megaterium
Source: MDPI journal article supplement (doi:10.3390/bioengineering9030122), 2022-03-16
Supplement: s1 [file s1]

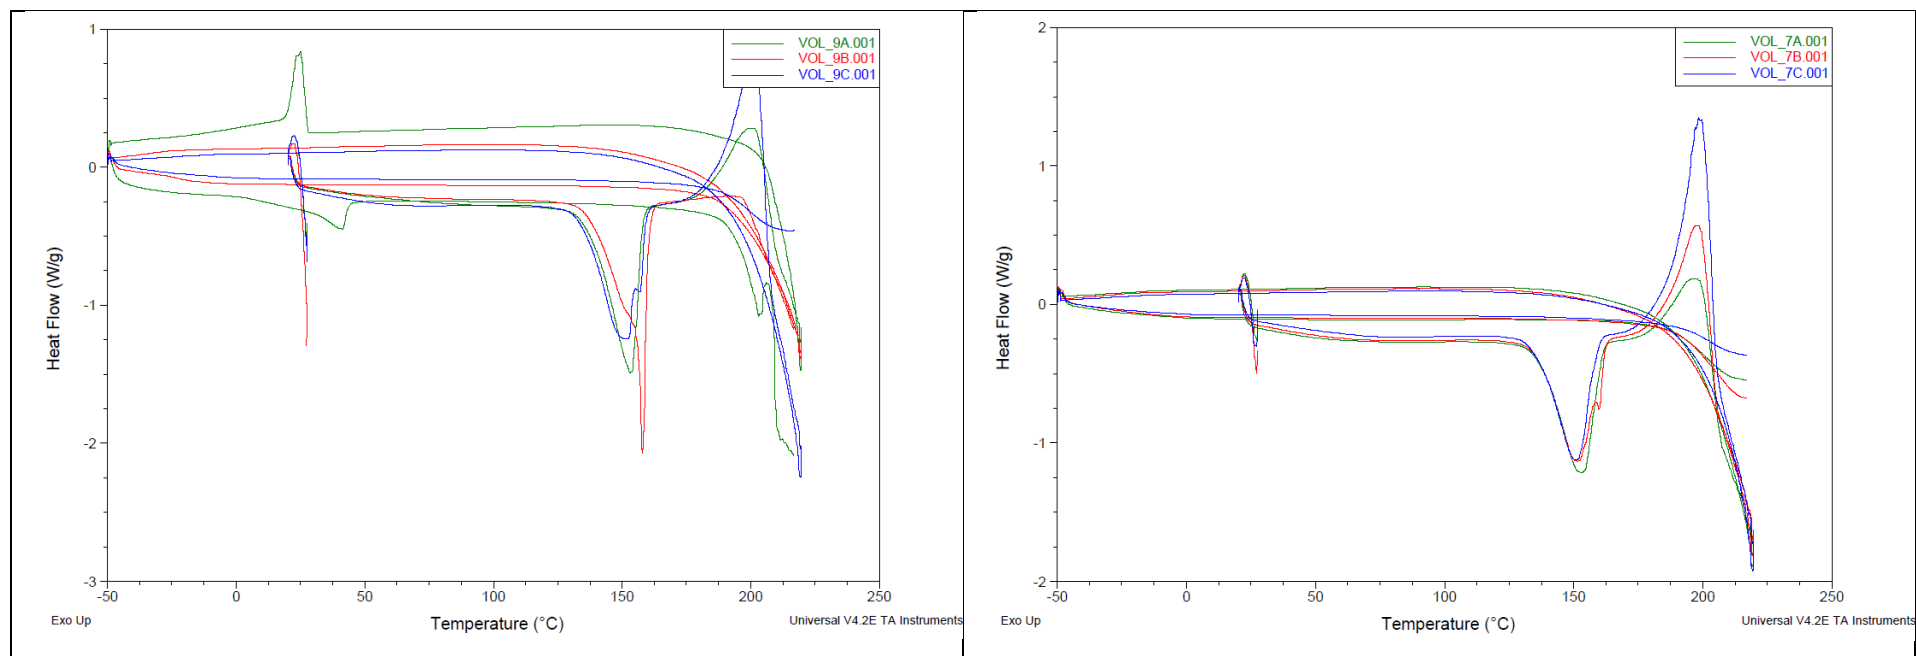

**Figure S1.** Differential scanning calorimetry (DSC) of the extracted polymers (left: process I, right: process II).

**Table S1.** Results differential scanning calorimetry (DSC) of the extracted polymers

| Sample                          | Sample weight<br>(mg) | T <sub>m</sub><br>(°C) | ΔH <sub>m</sub><br>(J/g) | T <sub>g</sub><br>(°C) | T <sub>m</sub><br>(°C) | T <sub>g</sub><br>(°C) |
|---------------------------------|-----------------------|------------------------|--------------------------|------------------------|------------------------|------------------------|
| Extracted Polymer<br>Process I  | 3.2                   | 152.98                 | 96.54                    | -25.34                 |                        |                        |
|                                 | 3.3                   | 157.80                 | 101.10                   | -23.80                 | 154.30                 | -23.27                 |
|                                 | 3.0                   | 152.11                 | 98.78                    | -20.66                 |                        |                        |
| Extracted Polymer<br>Process II | 3.3                   | 153.03                 | 89.93                    | -21.77                 |                        |                        |
|                                 | 3.1                   | 151.60                 | 92.68                    | -25.18                 | 151.84                 | -24.02                 |
|                                 | 3.5                   | 150.90                 | 83.40                    | -25.10                 |                        |                        |

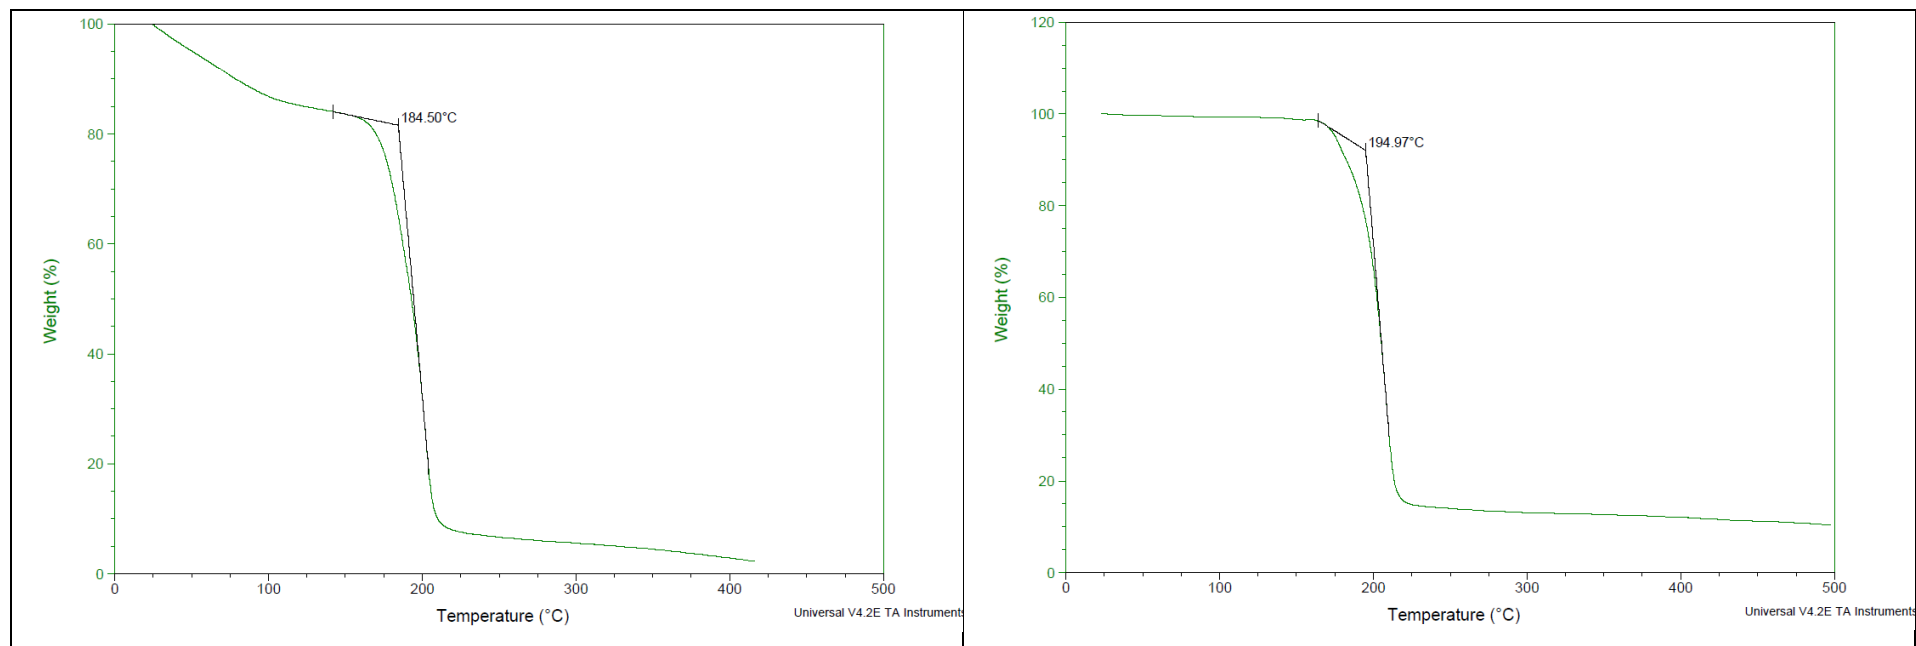

**Figure S2.** Thermogravimetric analysis (TGA) of the extracted polymers (left: process I, right: process II)
